# Supplementary material for: Trehalose–Carnosine Prevents the Effects of Spinal Cord Injury Through Regulating Acute Inflammation and Zinc(II) Ion Homeostasis
Source: PubMed Central journal article supplement (PMC10079760; doi:10.1007/s10571-022-01273-w), 2022-09-19

# Supplementary materials

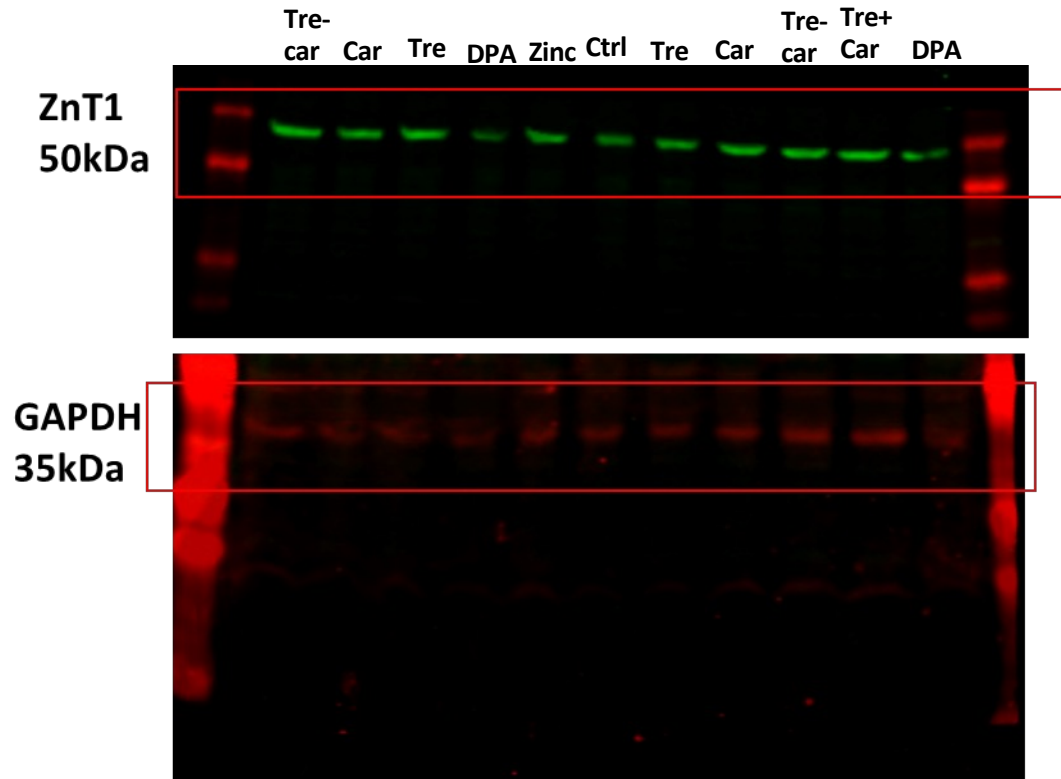

Supplement: 10571_2022_1273_MOESM1_ESM.pdf [file 10571_2022_1273_MOESM1_ESM.pdf]
